# Supplementary material
Source: publisher figshare collection journal article supplement (https://acs.figshare.com/ndownloader/files/15466505)
Supplement: Supplementary file 1 [file 15466505]

## Supplementary Information

### **Ultrafine AuPd Nanoclusters on Layered Double Hydroxides by the Capt-Capped AuPd Cluster Precursor Method: Synergistic Effect for Highly Efficient Aerobic Oxidation of Alcohols**

Jin Li, Yang Xu, Shuai Wang, and Hui Zhang<sup>\*</sup>

*State Key Laboratory of Chemical Resource Engineering, Beijing University of Chemical Technology, P.O. Box 98, Beijing 100029, China*

*\*Email: huizhang67@gst21.com, zhanghui@mail.buct.edu.cn*

*Fax: +8610-6442 5385*

*Tel.: +8610-6442 5872*

### Preparation of Au<sub>25</sub>Capt<sub>18</sub> NCs

The water-soluble, captopril-capped Au<sub>25</sub> NCs were prepared by a size-focusing synthetic methodology according to a previous report by Jin *et al.*<sup>1</sup> Typically, 8.23 mL of 10 mg/mL HAuCl<sub>4</sub>·4H<sub>2</sub>O methanol solution was added into a 25 mL flask containing 1.77 mL of methanol under vigorously magnetic stirring at 25 °C. Then, 126.8 mg of TOABr (0.23 mmol) was added to the solution, and the solution color changed from yellow to deep red. After 20 min, captopril solution (1 mmol, dissolved in 5 mL of methanol) was rapidly injected into above mixture under vigorous stirring. The solution became white. After 30 min, an aqueous solution of NaBH<sub>4</sub> (2 mmol, dissolved in 5 mL of ice-cold water) was added rapidly to the mixture under vigorous stirring and the solution immediately turned brown-blackish (photos shown in Figure S1). The reaction was allowed to proceed for 8 h and the reaction mixture was centrifuged (5000 rpm, 20 min) to remove unreacted, insoluble Au(I):SR intermediate complexes. The supernatant was collected and the solvent was removed by rotary evaporation (30 °C, 20 min) followed by adding ethanol (20 mL) and standing overnight to obtain a brown-blackish precipitate, which was dried in vacuum at 30 °C giving a raw product. Then, the raw product was extracted with minimum amount of methanol several times followed by adding ethanol (30 mL) and centrifuging (3000 rpm) for 10 min to obtain a purified brown-black precipitate, which was dried at 30 °C in vacuum overnight giving a purified brown-black product Au<sub>25</sub>Capt<sub>18</sub> NCs.

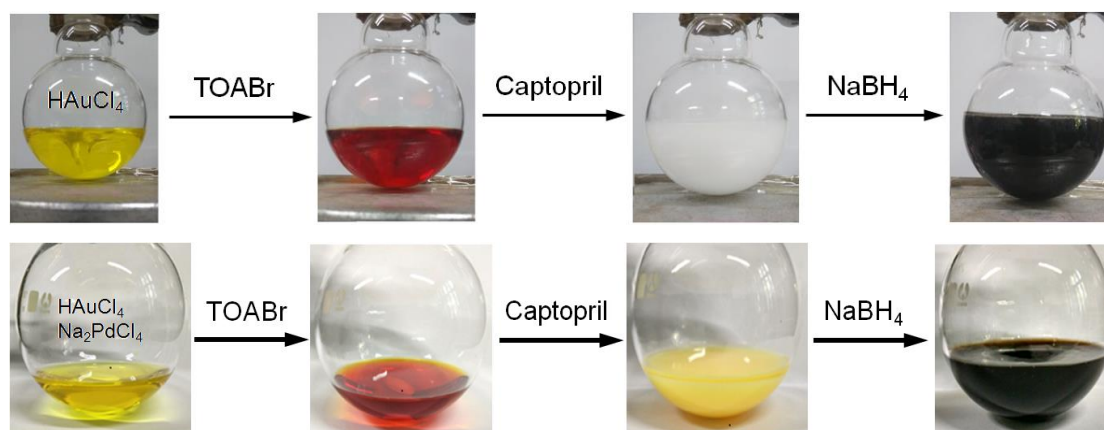

**Figure S1.** The color changes during the preparation of Au<sub>25</sub>Capt<sub>18</sub> (upper) and AuPd NCs (bottom).

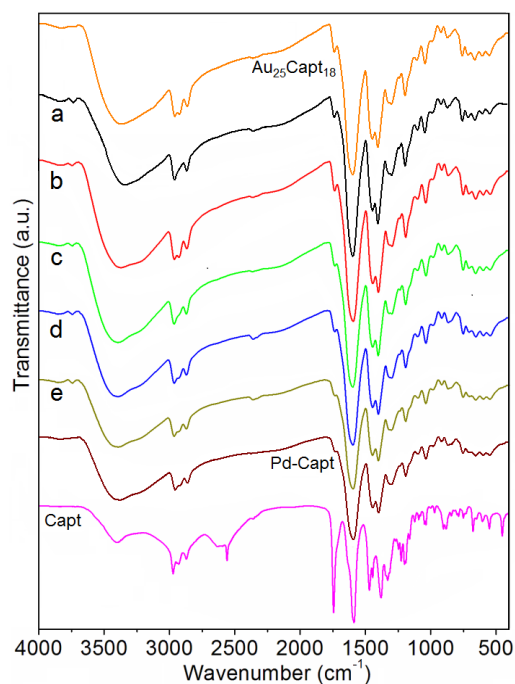

**Figure S2.** The FTIR spectra of Au<sub>96</sub>Pd<sub>4</sub>-Capt (a), Au<sub>91</sub>Pd<sub>9</sub>-Capt (b), Au<sub>87</sub>Pd<sub>13</sub>-Capt (c), Au<sub>69</sub>Pd<sub>31</sub>-Capt (d), and Au<sub>61</sub>Pd<sub>39</sub>-Capt (e) compared with Au<sub>25</sub>Capt<sub>18</sub>, Pd-Capt and Capt.

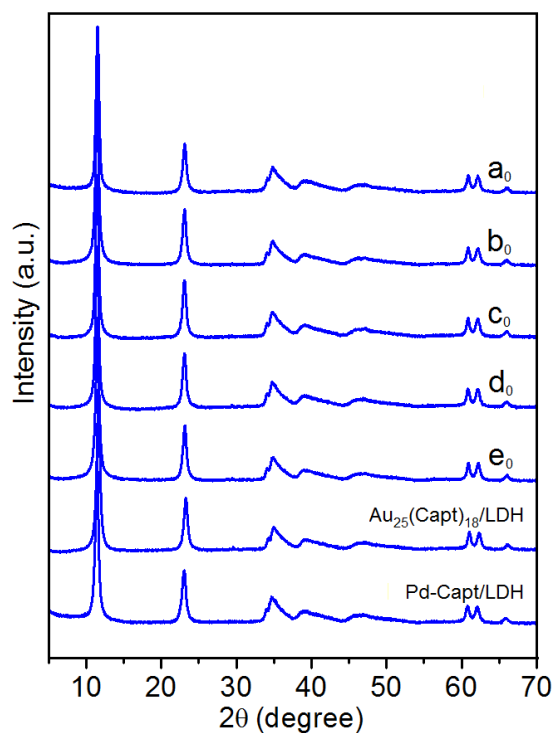

**Figure S3.** XRD patterns of the catalyst precursors Au<sub>96</sub>Pd<sub>4</sub>-Capt/LDH (a<sub>0</sub>), Au<sub>91</sub>Pd<sub>9</sub>-Capt/LDH (b<sub>0</sub>), Au<sub>87</sub>Pd<sub>13</sub>-Capt/LDH (c<sub>0</sub>), Au<sub>69</sub>Pd<sub>31</sub>-Capt/LDH (d<sub>0</sub>), and Au<sub>61</sub>Pd<sub>39</sub>-Capt/LDH (e<sub>0</sub>) compared with Au<sub>25</sub>(Capt)<sub>18</sub>/LDH and Pd-Capt/LDH.

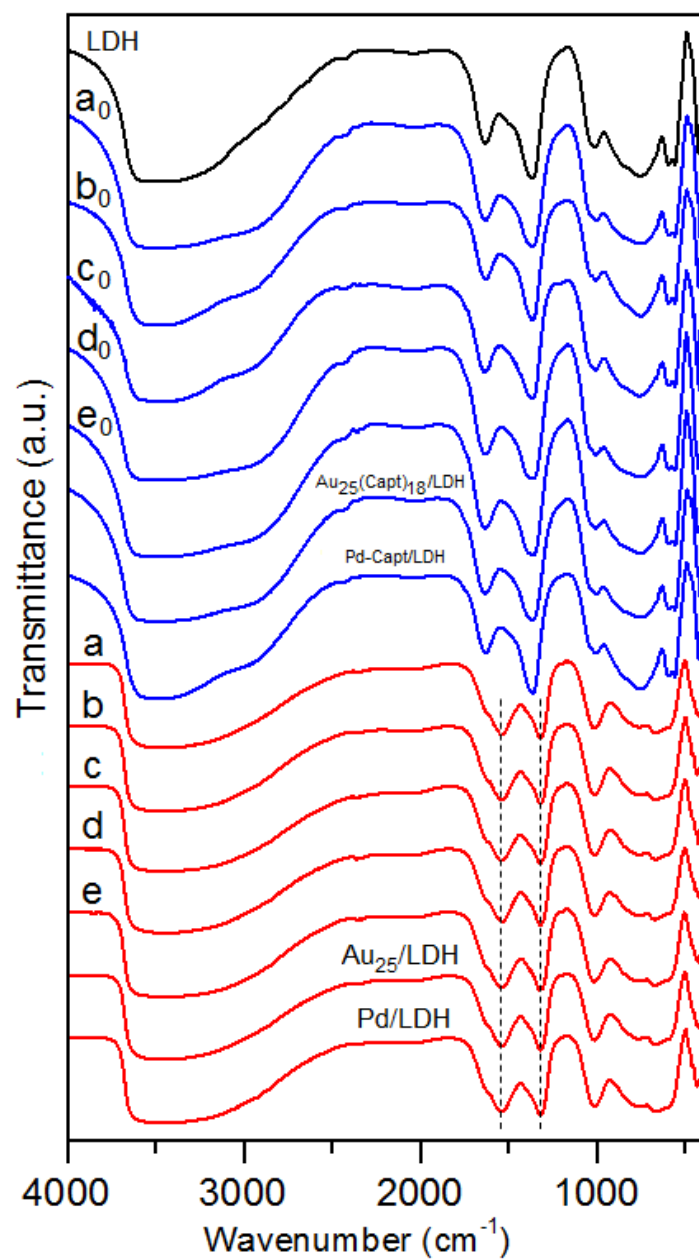

**Figure S4.** FTIR spectra of Au<sub>96</sub>Pd<sub>4</sub>/LDH (a), Au<sub>91</sub>Pd<sub>9</sub>/LDH (b), Au<sub>87</sub>Pd<sub>13</sub>/LDH (c), Au<sub>69</sub>Pd<sub>31</sub>/LDH (d), and Au<sub>61</sub>Pd<sub>39</sub>/LDH (e) compared with Au<sub>25</sub>/LDH, Pd/LDH, corresponding precursors (a<sub>0</sub>-e<sub>0</sub>), Au<sub>25</sub>(Capt)<sub>18</sub>/LDH, Pd-Capt/LDH and LDH support.

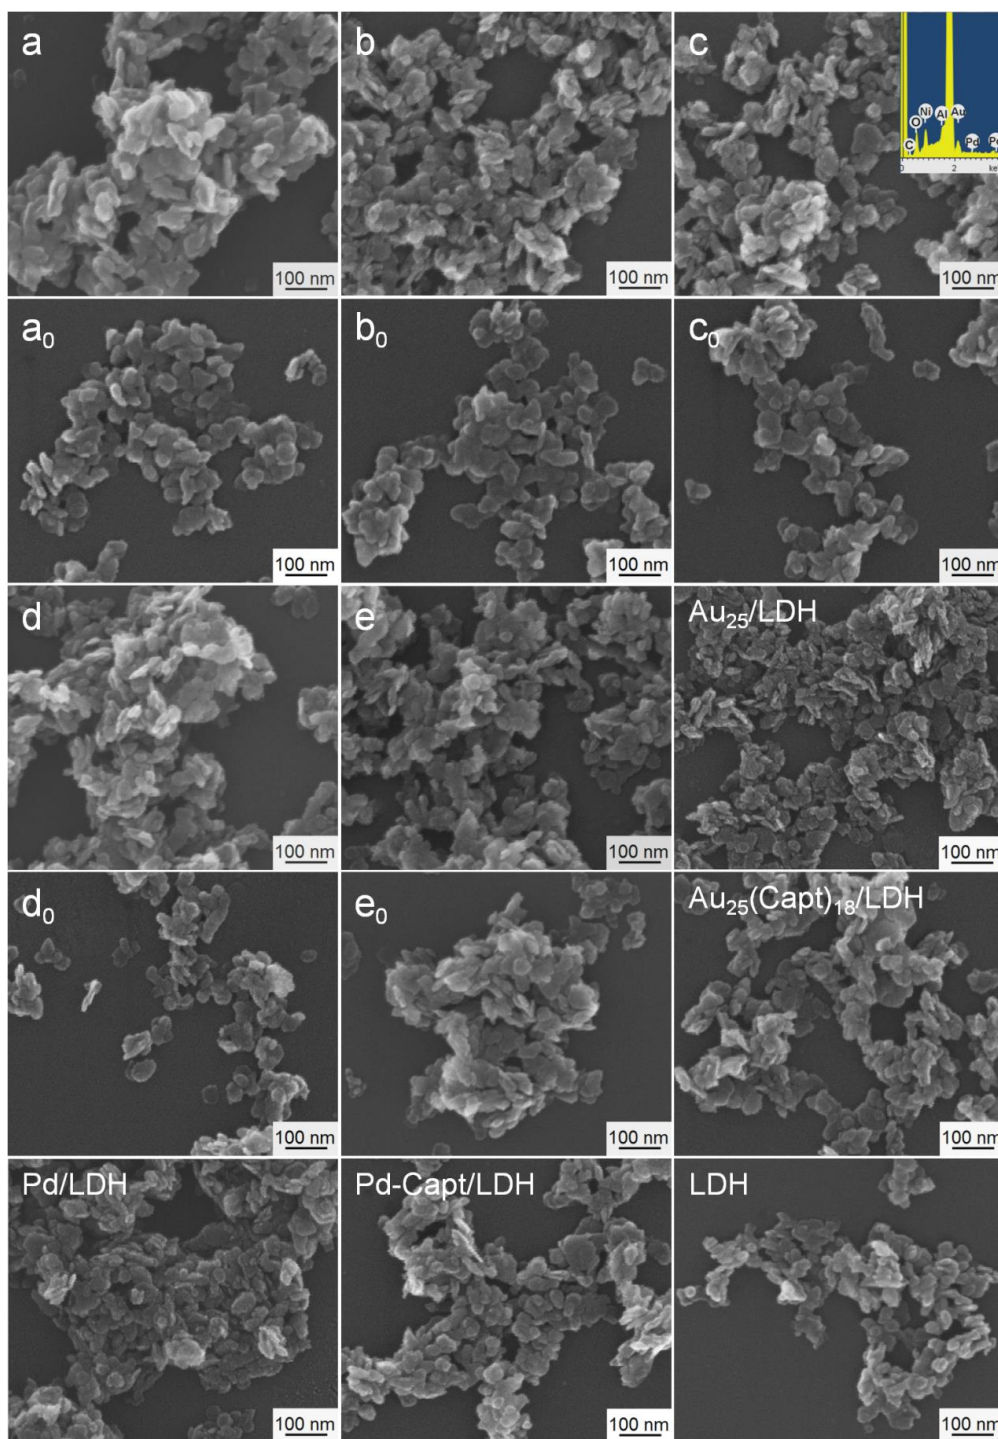

**Figure S5.** SEM images of Au<sub>96</sub>Pd<sub>4</sub>/LDH (a), Au<sub>91</sub>Pd<sub>9</sub>/LDH (b), Au<sub>87</sub>Pd<sub>13</sub>/LDH (c), Au<sub>69</sub>Pd<sub>31</sub>/LDH (d), and Au<sub>61</sub>Pd<sub>39</sub>/LDH (e) compared with Au<sub>25</sub>/LDH, Pd/LDH, corresponding precursors (a<sub>0</sub>-e<sub>0</sub>), Au<sub>25</sub>(Capt)<sub>18</sub>/LDH, Pd-Capt/LDH and LDH support.

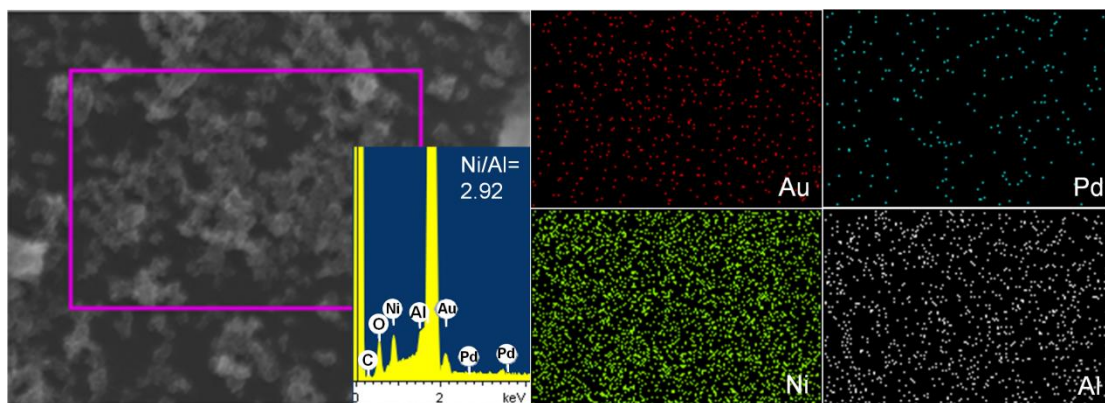

**Figure S6.** SEM, EDS and metal element mapping images of typical  $\text{Au}_{87}\text{Pd}_{13}/\text{LDH}$ .

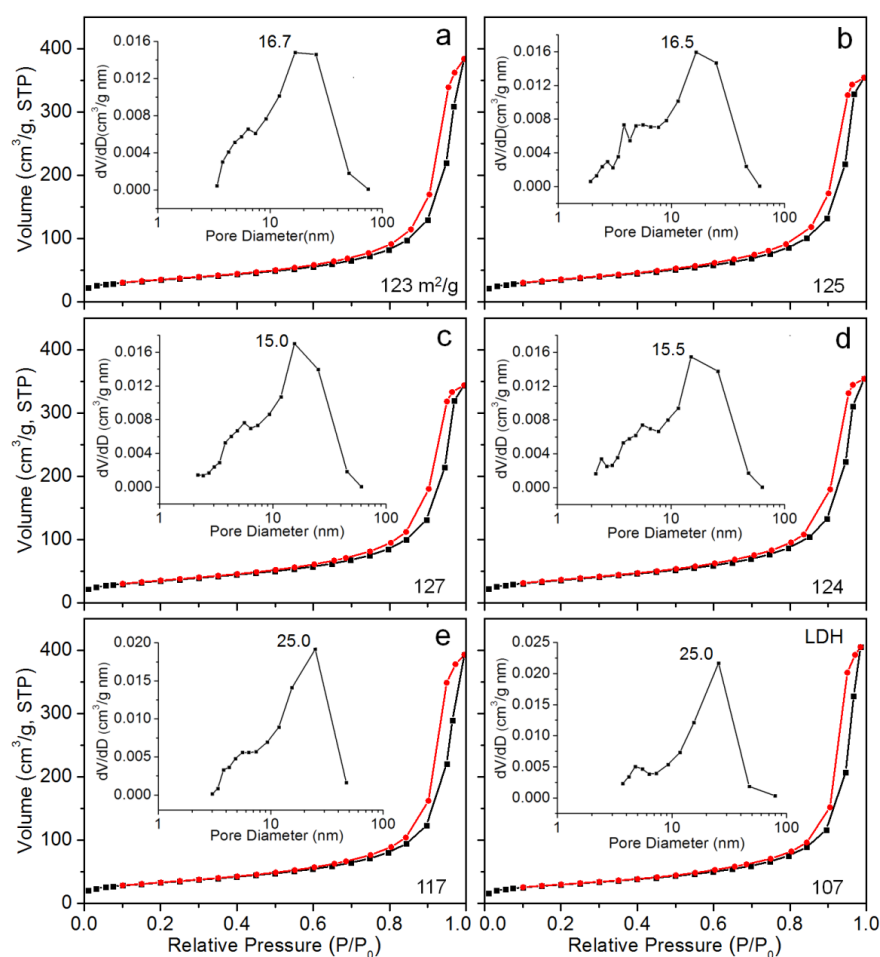

**Figure S7.**  $\text{N}_2$  adsorption-desorption isotherms and pore size distribution curves of  $\text{Au}_{96}\text{Pd}_4/\text{LDH}$  (a),  $\text{Au}_{91}\text{Pd}_9/\text{LDH}$  (b),  $\text{Au}_{87}\text{Pd}_{13}/\text{LDH}$  (c),  $\text{Au}_{69}\text{Pd}_{31}/\text{LDH}$  (d) and  $\text{Au}_{61}\text{Pd}_{39}/\text{LDH}$  (e) compared with LDH support.



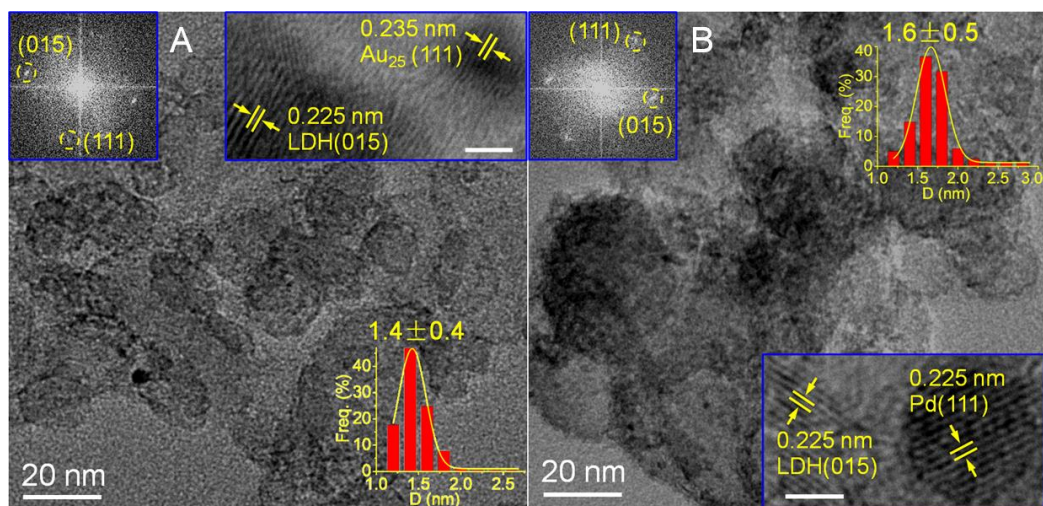

**Figure S8.** HRTEM images of monometallic Au<sub>25</sub>/LDH (A) and Pd/LDH (B) (insets: FFT, histogram of particle size distribution and the high-magnification HRTEM (scale bar: 1 nm)).

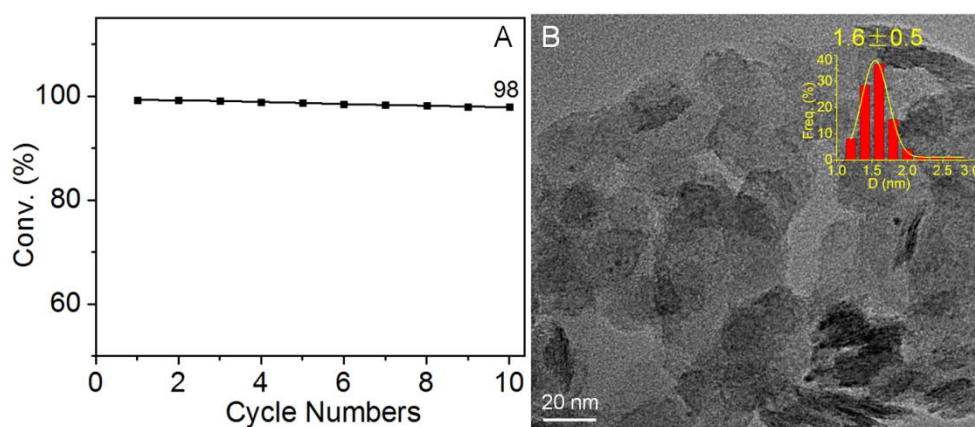

**Figure S9.** Recycling tests (A) over the Au<sub>87</sub>Pd<sub>13</sub>/LDH and HRTEM image (B) of the recovered Au<sub>87</sub>Pd<sub>13</sub>/LDH. Reaction conditions: 1-Phenylethanol (10 mmol), catalyst Au<sub>87</sub>Pd<sub>13</sub>/LDH (Au: 0.015 mol%), toluene (10 mL), O<sub>2</sub> (20 mL/min), 1 h.

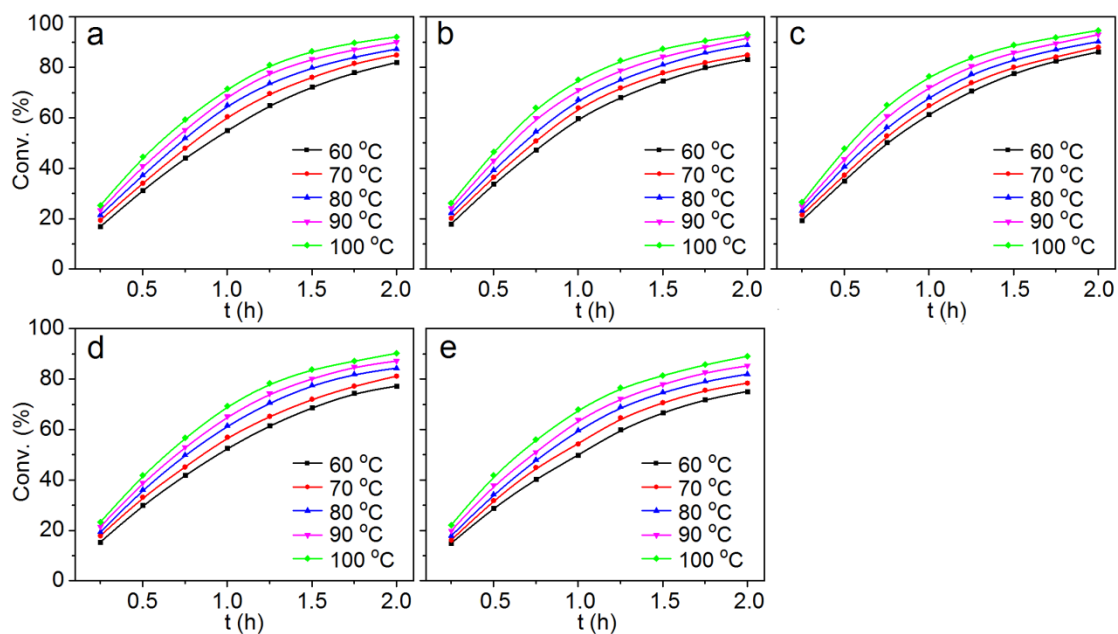

**Figure S10.** Conversion versus time plots for the oxidation of 1-phenylethanol over the series of catalysts  $\text{Au}_x\text{Pd}_y/\text{LDH}$  ( $x/y = 96/4$  (a),  $91/9$  (b),  $87/13$  (c),  $69/31$  (d) and  $61/39$  (e)) at varied reaction temperatures.

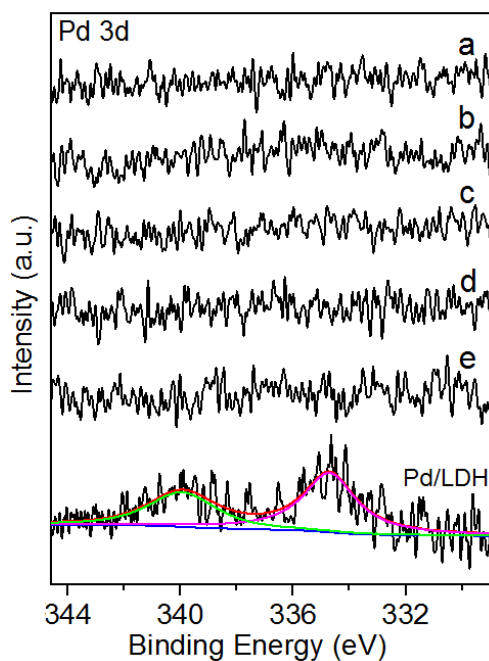

**Figure S11.** Pd 3d XPS spectra of  $\text{Au}_{96}\text{Pd}_4/\text{LDH}$  (a),  $\text{Au}_{91}\text{Pd}_9/\text{LDH}$  (b),  $\text{Au}_{87}\text{Pd}_{13}/\text{LDH}$  (c),  $\text{Au}_{69}\text{Pd}_{31}/\text{LDH}$  (d), and  $\text{Au}_{61}\text{Pd}_{39}/\text{LDH}$  (e) compared with  $\text{Pd}/\text{LDH}$ .



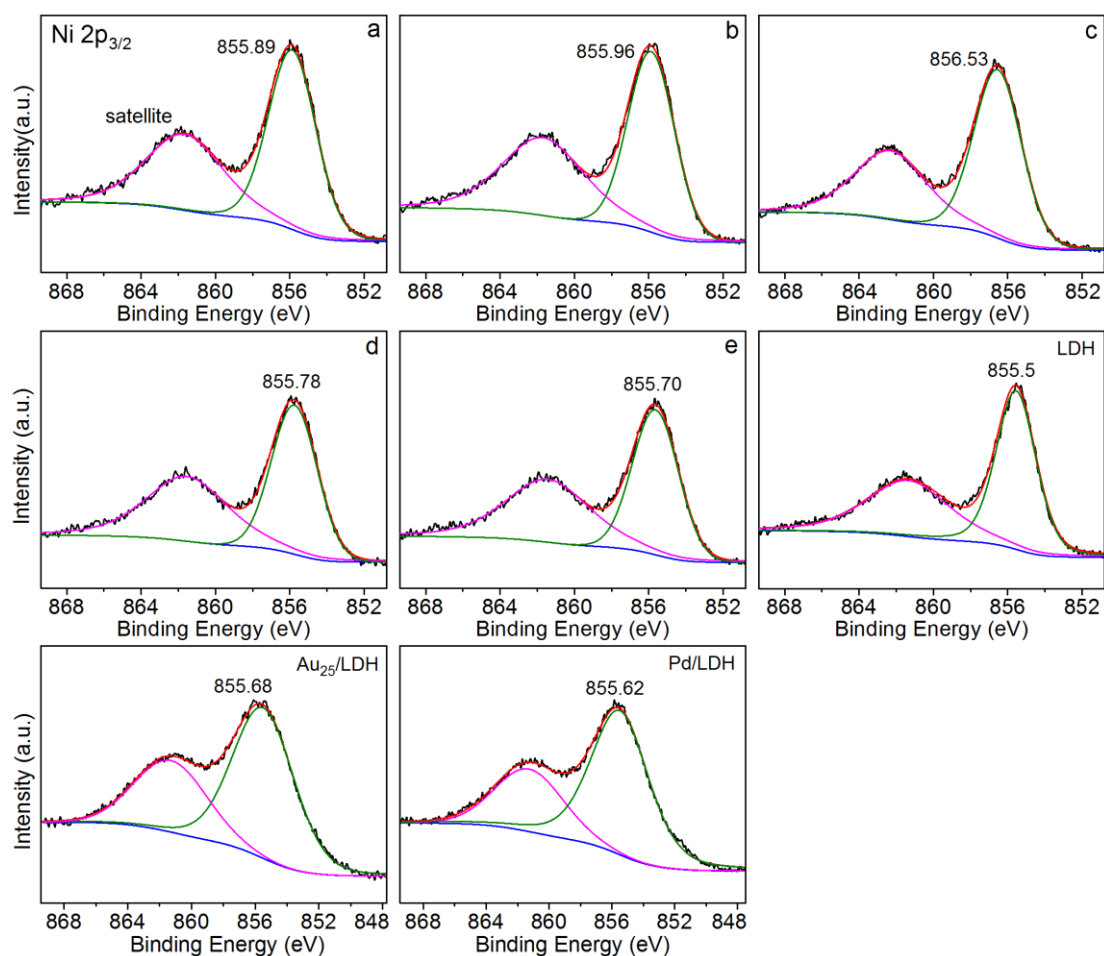

**Figure S12.** Ni 2p XPS spectra of Au<sub>96</sub>Pd<sub>4</sub>/LDH (a), Au<sub>91</sub>Pd<sub>9</sub>/LDH (b), Au<sub>87</sub>Pd<sub>13</sub>/LDH (c), Au<sub>69</sub>Pd<sub>31</sub>/LDH (d), and Au<sub>61</sub>Pd<sub>39</sub>/LDH (e) compared with Au<sub>25</sub>/LDH, Pd/LDH and LDH support.

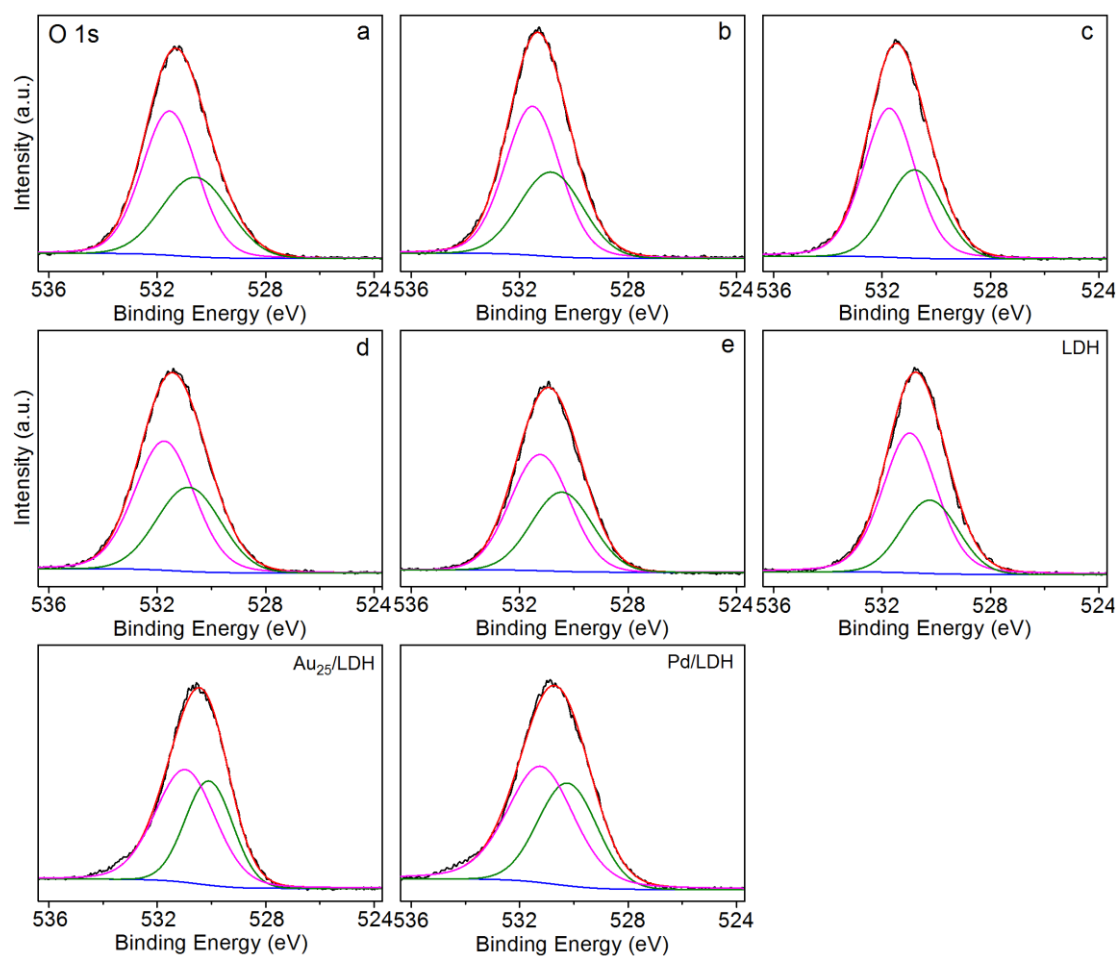

**Figure S13.** O 1s XPS spectra of Au<sub>96</sub>Pd<sub>4</sub>/LDH (a), Au<sub>91</sub>Pd<sub>9</sub>/LDH (b), Au<sub>87</sub>Pd<sub>13</sub>/LDH (c), Au<sub>69</sub>Pd<sub>31</sub>/LDH (d), and Au<sub>61</sub>Pd<sub>39</sub>/LDH (e) compared with Au<sub>25</sub>/LDH, Pd/LDH and LDH support.

**Table S1.** ICP data of the Au<sub>x</sub>Pd<sub>y</sub>/LDH catalysts compared with the corresponding Au<sub>x</sub>Pd<sub>y</sub>-Capt NCs.

| Samples                                      | Au (wt.%)    | Pd (wt.%)    | Au (at.%) | Pd (at.%) | Au/Pd (mol/mol) <sup>a</sup>   |
|----------------------------------------------|--------------|--------------|-----------|-----------|--------------------------------|
| Au <sub>25</sub> /LDH                        | 0.1982       | -            | 100       | 0         | -                              |
| Au <sub>96</sub> Pd <sub>4</sub> /LDH        | 0.1918       | 0.0043       | 96.01     | 3.99      | 96/4                           |
| Au <sub>91</sub> Pd <sub>9</sub> /LDH        | 0.1834       | 0.0096       | 91.17     | 8.83      | 91/9                           |
| Au <sub>87</sub> Pd <sub>13</sub> /LDH       | 0.1824       | 0.0146       | 87.09     | 12.91     | 87/13                          |
| Au <sub>69</sub> Pd <sub>31</sub> /LDH       | 0.1586       | 0.0384       | 69.04     | 30.96     | 69/31                          |
| Au <sub>61</sub> Pd <sub>39</sub> /LDH       | 0.1502       | 0.0521       | 60.92     | 39.08     | 61/39                          |
| Pd/LDH                                       | -            | 0.1922       | 0         | 100       | -                              |
| Clusters                                     | Au (μmol/ml) | Pd (μmol/ml) | Au (at.%) | Pd (at.%) | Au/Pd (mol/mol) <sup>a,b</sup> |
| Au <sub>25</sub> (Capt) <sub>18</sub>        | 0.7376       | 0            | 100       | -         | -                              |
| Au <sub>96</sub> Pd <sub>4</sub> -Capt/LDH   | 0.6608       | 0.0276       | 95.99     | 4.01      | 96/4 (24/1)                    |
| Au <sub>91</sub> Pd <sub>9</sub> -Capt/LDH   | 0.4994       | 0.0506       | 90.80     | 9.20      | 91/9 (23/2)                    |
| Au <sub>87</sub> Pd <sub>13</sub> -Capt /LDH | 0.6474       | 0.0976       | 86.90     | 13.10     | 87/13 (22/3)                   |
| Au <sub>69</sub> Pd <sub>31</sub> -Capt LDH  | 0.5512       | 0.2484       | 68.94     | 31.06     | 69/31 (20/5)                   |
| Au <sub>61</sub> Pd <sub>39</sub> -Capt /LDH | 0.5947       | 0.3809       | 60.96     | 39.04     | 61/39 (18/7)                   |
| Pd-Capt                                      | 0            | 1.288        | 0         | 100       | -                              |

<sup>a</sup> Au/Pd ratios based on molar percentages of Au or Pd with respect to total metal (Au + Pd).

<sup>b</sup> Data in brackets refer to theoretical Au/Pd molar ratios.

**Table S2.** XRD parameters of the series of Au<sub>x</sub>Pd<sub>y</sub>/LDH catalysts compared with corresponding Au<sub>x</sub>Pd<sub>y</sub>-Capt/LDH precursors and LDH support.

| Samples                                     | $d_{003}(\text{nm})$ | $d_{110}(\text{nm})$ | $c(\text{nm})^a$ | $a(\text{nm})^a$ | $D_{003}(\text{nm})^b$ | $D_{110}(\text{nm})^b$ |
|---------------------------------------------|----------------------|----------------------|------------------|------------------|------------------------|------------------------|
| Au <sub>25</sub> /LDH                       | 0.679                | 0.1504               | 2.037            | 0.3008           | 8.918                  | 21.01                  |
| Au <sub>96</sub> Pd <sub>4</sub> /LDH       | 0.682                | 0.1506               | 2.046            | 0.3012           | 8.717                  | 20.88                  |
| Au <sub>91</sub> Pd <sub>9</sub> /LDH       | 0.690                | 0.1508               | 2.070            | 0.3016           | 8.614                  | 20.96                  |
| Au <sub>87</sub> Pd <sub>13</sub> /LDH      | 0.693                | 0.1512               | 2.079            | 0.3024           | 8.559                  | 21.09                  |
| Au <sub>69</sub> Pd <sub>31</sub> /LDH      | 0.683                | 0.1513               | 2.049            | 0.3026           | 8.748                  | 20.92                  |
| Au <sub>61</sub> Pd <sub>39</sub> /LDH      | 0.688                | 0.1510               | 2.064            | 0.3020           | 8.760                  | 20.89                  |
| Pd/LDH                                      | 0.685                | 0.1511               | 2.055            | 0.3022           | 8.945                  | 20.91                  |
| Au <sub>25</sub> Capt <sub>18</sub> /LDH    | 0.762                | 0.1520               | 2.286            | 0.3040           | 16.12                  | 22.90                  |
| Au <sub>96</sub> Pd <sub>4</sub> -Capt/LDH  | 0.762                | 0.1522               | 2.286            | 0.3044           | 16.10                  | 22.87                  |
| Au <sub>91</sub> Pd <sub>9</sub> -Capt/LDH  | 0.762                | 0.1522               | 2.286            | 0.3044           | 15.95                  | 22.74                  |
| Au <sub>87</sub> Pd <sub>13</sub> -Capt/LDH | 0.762                | 0.1523               | 2.286            | 0.3046           | 15.92                  | 22.68                  |
| Au <sub>69</sub> Pd <sub>31</sub> -Capt/LDH | 0.764                | 0.1520               | 2.292            | 0.3040           | 16.08                  | 22.88                  |
| Au <sub>61</sub> Pd <sub>39</sub> -Capt/LDH | 0.764                | 0.1518               | 2.292            | 0.3036           | 16.12                  | 22.94                  |
| Pd-Capt/LDH                                 | 0.764                | 0.1518               | 2.292            | 0.3036           | 16.06                  | 22.84                  |
| LDH                                         | 0.760                | 0.1519               | 2.280            | 0.3038           | 16.04                  | 22.95                  |

<sup>a</sup> Based on hexagonal crystal system,  $a = 2d_{110}$ ,  $c = 3d_{003}$ .

<sup>b</sup> Estimated by Scherrer equation  $D_{(hkl)} = 0.89\lambda/\beta\cos\theta$  ( $\lambda$  is X-ray wavelength (Cu K $\alpha$ : 0.15418 nm),  $\beta$  is half-height width of the diffraction peak in radian,  $\theta$  is the Bragg diffraction angle in degree).

**Table S3.** Reaction rate constants of the aerobic oxidation of 1-phenylethanol over the series of catalysts Au<sub>x</sub>Pd<sub>y</sub>/LDH. <sup>a</sup>

| Catalysts                              | $k$ (h <sup>-1</sup> ) <sup>b</sup> |                    |                   |                   |                   | $E_a$ <sup>c</sup> (kJ/mol) |
|----------------------------------------|-------------------------------------|--------------------|-------------------|-------------------|-------------------|-----------------------------|
|                                        | 60 °C                               | 70 °C              | 80 °C             | 90 °C             | 100 °C            |                             |
| Au <sub>96</sub> Pd <sub>4</sub> /LDH  | 0.8481<br>(0.9973)                  | 0.9912<br>(0.9964) | 1.137<br>(0.9944) | 1.312<br>(0.9917) | 1.524<br>(0.9879) | 15.0<br>(0.9985)            |
| Au <sub>91</sub> Pd <sub>9</sub> /LDH  | 0.9276<br>(0.9961)                  | 1.060<br>(0.9945)  | 1.209<br>(0.9927) | 1.385<br>(0.9903) | 1.603<br>(0.9842) | 14.0<br>(0.9963)            |
| Au <sub>87</sub> Pd <sub>13</sub> /LDH | 1.027<br>(0.9941)                   | 1.191<br>(0.9930)  | 1.332<br>(0.9919) | 1.498<br>(0.9903) | 1.712<br>(0.9876) | 12.9<br>(0.9974)            |
| Au <sub>69</sub> Pd <sub>31</sub> /LDH | 0.760<br>(0.9945)                   | 0.903<br>(0.9912)  | 1.043<br>(0.9871) | 1.197<br>(0.9854) | 1.417<br>(0.9829) | 15.8<br>(0.9973)            |
| Au <sub>61</sub> Pd <sub>39</sub> /LDH | 0.7245<br>(0.9965)                  | 0.8789<br>(0.9943) | 1.017<br>(0.9916) | 1.170<br>(0.9896) | 1.388<br>(0.9864) | 16.4<br>(0.9971)            |

<sup>a</sup> Reaction conditions: 1-phenylethanol (5 mmol), catalyst (Au: 0.01 mol%), toluene (5 mL), O<sub>2</sub> (20 mL/min), 1 h.

<sup>b</sup> The data in parentheses represent the fitting determination coefficient  $R^2$ .

<sup>c</sup> According to Arrhenius equation:  $k = A \exp(-E_a/RT)$  ( $E_a$  is the apparent activation energy, kJ/mol,  $k$  is the reaction rate constant, h<sup>-1</sup>,  $A$  is the pre-exponential factor, h<sup>-1</sup>,  $R$  is the molar gas constant, 8.314 J·mol<sup>-1</sup>·K<sup>-1</sup>, and  $T$  is the absolute temperature, K).

**Table S4.** XPS data of the series of Au<sub>x</sub>Pd<sub>y</sub>/LDH catalysts compared with the monometallic Au<sub>25</sub>/LDH, Pd/LDH and LDH support.

| Samples                                | Au 4f <sub>7/2</sub><br>(eV) | ΔBE<br>(eV) <sup>a</sup> | Pd 3d <sub>5/2</sub><br>(eV) | Ni 2p <sub>3/2</sub><br>(eV) | O 1s (eV)<br>(–OH) | O 1s (eV)<br>(O <sup>2–</sup> ) |
|----------------------------------------|------------------------------|--------------------------|------------------------------|------------------------------|--------------------|---------------------------------|
| Au <sub>96</sub> Pd <sub>4</sub> /LDH  | 83.10                        | 0.34                     | n.d.                         | 855.89                       | 531.54<br>(61.44%) | 530.59<br>(38.56%)              |
| Au <sub>91</sub> Pd <sub>9</sub> /LDH  | 82.97                        | 0.47                     | n.d.                         | 855.96                       | 531.52<br>(62.37%) | 530.84<br>(37.63%)              |
| Au <sub>87</sub> Pd <sub>13</sub> /LDH | 82.86                        | 0.58                     | n.d.                         | 856.53                       | 531.73<br>(63.29%) | 530.79<br>(36.71%)              |
| Au <sub>69</sub> Pd <sub>31</sub> /LDH | 83.20                        | 0.24                     | n.d.                         | 855.78                       | 531.74<br>(60.64%) | 530.83<br>(39.36%)              |
| Au <sub>61</sub> Pd <sub>39</sub> /LDH | 83.29                        | 0.15                     | n.d.                         | 855.70                       | 531.24<br>(59.86%) | 530.43<br>(40.14%)              |
| Au <sub>25</sub> /LDH                  | 83.44                        | -                        | -                            | 855.68                       | 531.52<br>(59.42%) | 530.18<br>(40.58%)              |
| Pd/LDH                                 | -                            | -                        | 334.71                       | 855.62                       | 531.34<br>(59.36%) | 530.32<br>(40.64%)              |
| LDH                                    | -                            | -                        | -                            | 855.50                       | 530.97<br>(67.25%) | 530.23<br>(32.75%)              |

<sup>a</sup> Binding energy shift of Au 4f<sub>7/2</sub> of the Au<sub>x</sub>Pd<sub>y</sub>/LDH catalysts compared with the Au<sub>25</sub>/LDH.

## References

1. Kumar, S.; Jin, R. C. Water-Soluble Au<sub>25</sub>(Capt)<sub>18</sub> Nanoclusters: Synthesis, Thermal Stability, and Optical Properties. *Nanoscale* **2012**, *4*, 4222–4227.
